# Supplementary material for: Methods for Accurate Assessment of Myofiber Maturity During Skeletal Muscle Regeneration
Source: PubMed Central journal article supplement (PMC7188918; doi:10.3389/fcell.2020.00267), 2020-04-22
Supplement: Data_Sheet_1.pdf [file Data_Sheet_1.pdf]

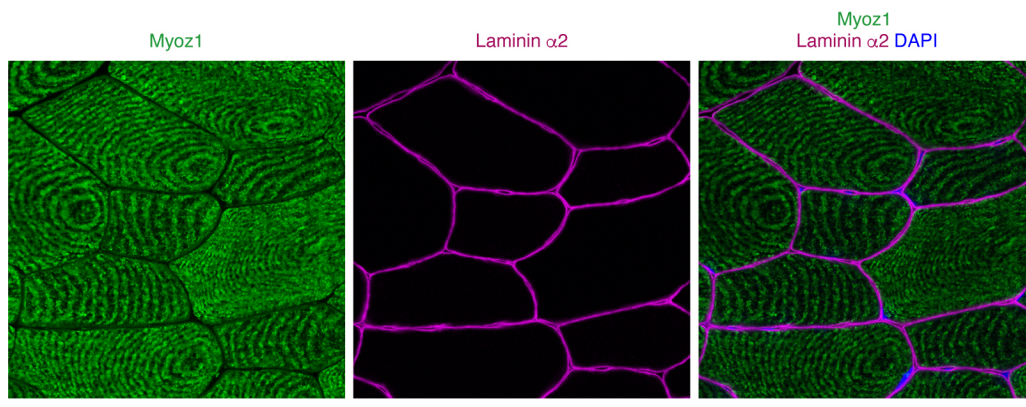

**Supplementary Figure 1**

**Supplementary Figure 1. Myoz1 staining reveals sarcomere pattern in myofiber.**

TA muscle section was subjected to immunofluorescent staining for Myoz1 (green) and Laminin a2 (magenta). Scale bar, 25  $\mu$ m

Supplementary Table 1. Primers used in qRT-PCR

| Gene  | Direction | Sequence                       |
|-------|-----------|--------------------------------|
| Myoz1 | Forward   | 5'-GGAACTTGGCATTGACCTACTG-3'   |
|       | Reverse   | 5'-AAACTTGGGCATCTGGAAGG-3'     |
| Myoz2 | Forward   | 5'-CAGAACTGCGGGATTACAGG-3'     |
|       | Reverse   | 5'-GTCTGCCCGAAAGAGGATTG-3'     |
| Myoz3 | Forward   | 5'-TGGCAGCAGAAGTCACACTC-3'     |
|       | Reverse   | 5'-AGTTCCAAGCCACTGAAGGAC-3'    |
| Tnni2 | Forward   | 5'-CGGAGACAGCACCTGAAGAG-3'     |
|       | Reverse   | 5'-AGACATGGAGCCTGGGATG-3'      |
| Dmd   | Forward   | 5'-GGAAGAAGTAGAGGACTGTTATG-3'  |
|       | Reverse   | 5'-AGGTCTAGGAGGCGTTTTCC-3'     |
| Myh4  | Forward   | 5'-AAACCACCTCAGAGTTGTGGA-3'    |
|       | Reverse   | 5'-GTTCCGAAGGTTCTGATTGC-3'     |
| Myf6  | Forward   | 5'-ATCAGCTACATTGAGCGTCTACA-3'  |
|       | Reverse   | 5'-CCTGGAATGATCCGAAACACTTG-3'  |
| MyoD  | Forward   | 5'-CCACTCCGGACATAGACTTG-3'     |
|       | Reverse   | 5'-AAAAGCGCAGGTCTGGTGAG-3'     |
| Myog  | Forward   | 5'-CAGTACATTGAGCGCCTACAG-3'    |
|       | Reverse   | 5'-GGACCGAACTCCAGTGCAT-3'      |
| Myh3  | Forward   | 5'-ACACGGATCAGAGAGCTGGA-3'     |
|       | Reverse   | 5'-CCTTAACACGCCGCTCATAAC-3'    |
| Myh8  | Forward   | 5'-CATCCACGCAGCAGATTGA-3'      |
|       | Reverse   | 5'-CGCAGCAGATCACAGTCGT-3'      |
| Cmas  | Forward   | 5'-CAAAGGCATCCCCTGAAGA-3'      |
|       | Reverse   | 5'-CCCACACACTCTGGAAGACC-3'     |
| Gapdh | Forward   | 5'-CCTGGAGAAACCTGCCAAGTATG-3'  |
|       | Reverse   | 5'-AGAGTGGGAGTTGCTGTTGAAGTC-3' |

Supplementary Table 2. Antibodies used in this study

| Antibody                                           | Dilution | Supplier                                    |
|----------------------------------------------------|----------|---------------------------------------------|
| Rabbit polyclonal anti-Dystrophin                  | 1:800    | Abcam                                       |
| Mouse monoclonal anti-embryonic Myosin heavy chain | 1:2      | Clone: F1.652, DSHB                         |
| Rabbit polyclonal anti-Myoz1                       | 1:250    | Sigma                                       |
| Rat monoclonal anti-Laminin $\alpha$ 2             | 1:200    | Clone: 4H8-2,<br>SantaCruz<br>Biotechnology |
| Alexa Fluor 488-conjugated donkey anti-rabbit IgG  | 1:1000   | Jackson<br>ImmunoResarch                    |
| Cy3-conjugated donkey anti-mouse IgG               | 1:1000   | Jackson<br>ImmunoResarch                    |
| Alexa Fluor 647-conjugated chick anti-rat IgG      | 1:1000   | Molecular Probes                            |
